# Supplementary material for: Effect of Sugar Beet Pulp on the Composition and Predicted Function of Equine Fecal Microbiota
Source: MDPI journal article supplement (doi:10.3390/biology12091254), 2023-09-19
Supplement: s1 [file s1]

## Supplemental Figures

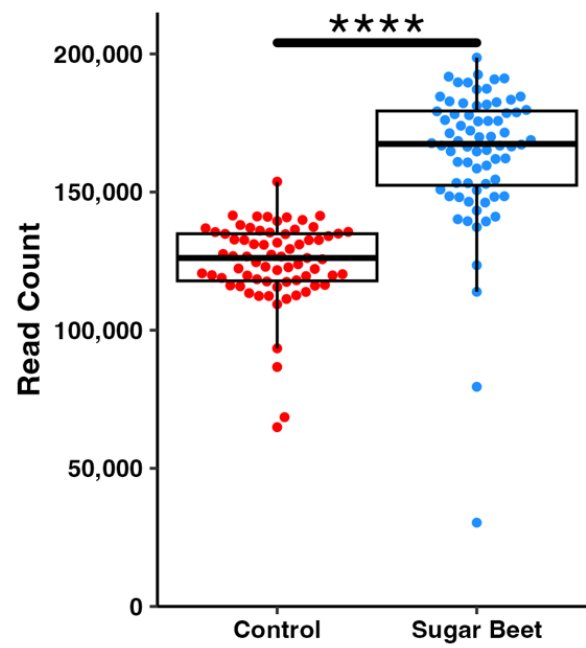

**Figure S1.** Dot plot showing difference in read counts between control and sugar beet pulp treatment groups. \*\*\*\*  $p < 0.0001$ , student's t-test.

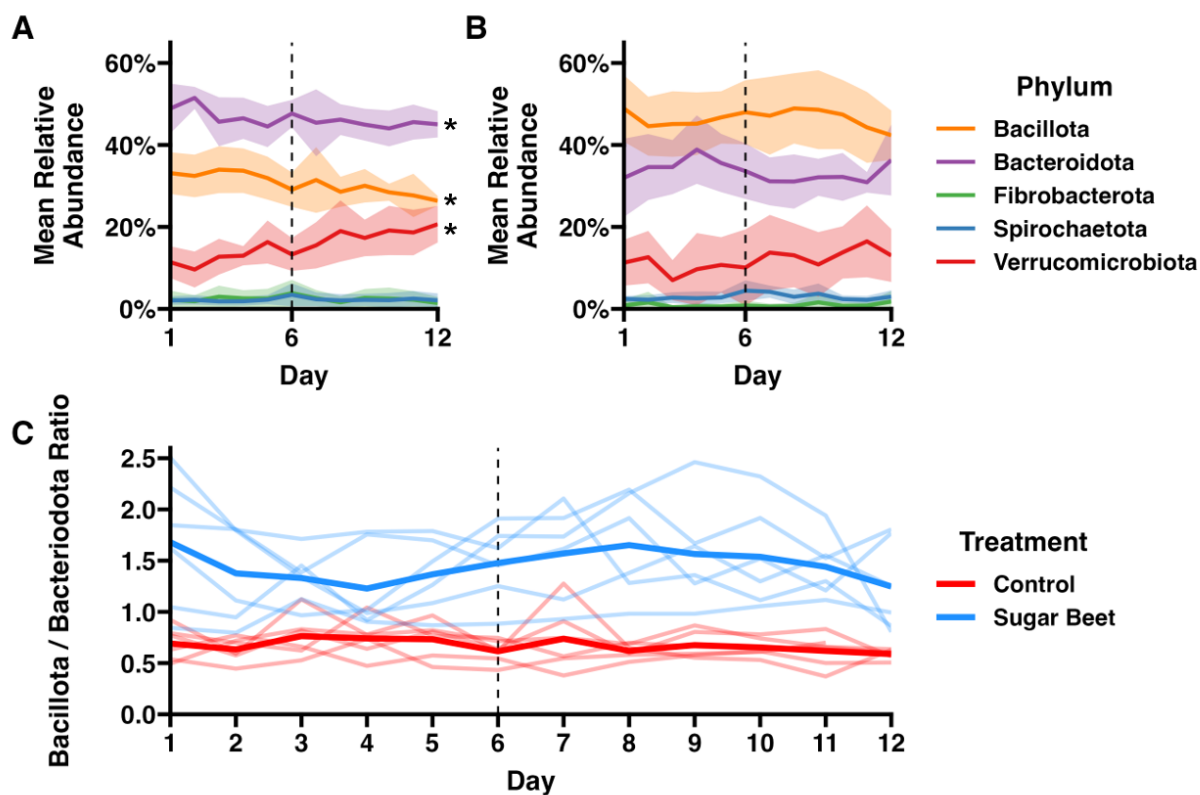

**Figure S2.** Relative abundance of dominant (relative abundance > 1%) phyla over the course of the study in Control (A) and SBP (B) groups. Dark line and lighter ribbon denote mean and standard deviation. (C) Bacillota-to-Bacteroidota (formerly Firmicutes-to-Bacteroidetes) ratio over time. Vertical dotted line indicates the introduction of SBP to the diet in the treatment group. Time: \*  $p < 0.05$ . One-way ANOVA within phylum.

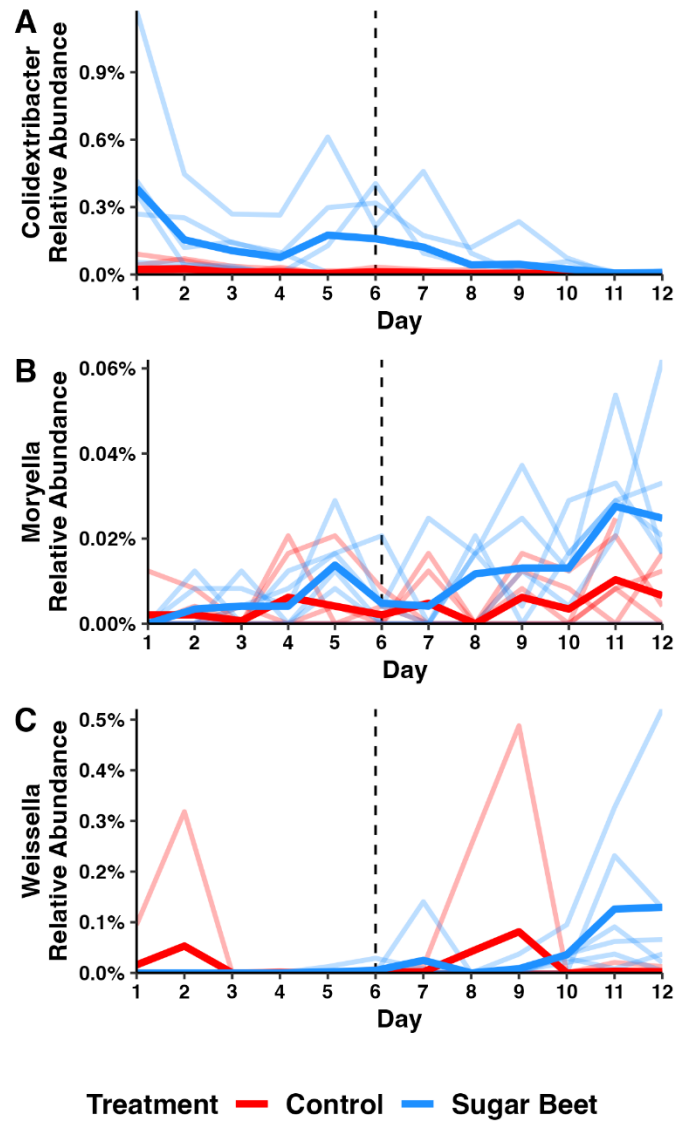

**Figure S3.** Spaghetti plots depicting relative abundance of **(A)** *Colidextribacter*, **(B)** *Moryella*, and **(C)** *Weissella* across time. Light lines depict individual horses; dark lines depict average relative abundance of groups (legend below). Dotted vertical line indicates diet change for SBP group on day 6 (D6).

| Horse   | Group                 | Breed                  | Sex | Age |
|---------|-----------------------|------------------------|-----|-----|
| Gunner  | control               | American Quarter Horse | MC  | 24  |
| Rosie   | control               | American Paint         | F   | 22  |
| Christy | control               | American Quarter Horse | F   | 11  |
| Ellie   | control               | American Quarter Horse | F   | 18  |
| Pride   | control               | Thoroughbred           | MC  | 14  |
| Diamond | control               | American Quarter Horse | F   | 18  |
| Diamond | sugar beet pulp (SBP) | American Quarter Horse | F   | 19  |
| Cricket | sugar beet pulp (SBP) | Pony-Unlisted Breed    | F   | 22  |
| Frosty  | sugar beet pulp (SBP) | American Quarter Horse | MC  | 19  |
| Atlas   | sugar beet pulp (SBP) | Thoroughbred           | MC  | 11  |
| Albie   | sugar beet pulp (SBP) | American Paint         | MC  | 19  |
| Quest   | sugar beet pulp (SBP) | American Paint         | MC  | 19  |

**Table S1.** Demographics of horses used in each treatment group

F = female, MC = male castrated; age in years
